# Supplementary material for: TLR7 Stimulation With Imiquimod Induces Selective Autophagy and Controls Mycobacterium tuberculosis Growth in Mouse Macrophages
Source: Front Microbiol. 2020 Jul 17;11:1684. doi: 10.3389/fmicb.2020.01684 (PMC7380068; doi:10.3389/fmicb.2020.01684)
Supplement: Supplementary file 1 [file Data_Sheet_1.XLSX]

## Sheet: Figure 1
Figure 1A (Left)	Raw264.7
	1	2	3	AVE	STDEV
Control	90.992	99.993	108.995	100	9.0015
IMQ	40.572	55.3286	39.2216	45.0407	8.93511
3MA	81.5148	99.9052	82.6919	88.0373	10.2948
3MA+IMQ	68.0941	72.1597	78.042	72.7653	5.00153
Figure 1A (Right)	THP-1
	1	2	3	AVE	STDEV
Control	90.9804	105.107	105.195	100	8.1816
IMQ	42.8037	56.2946	69.2226	56.107	13.2105
3MA	81.7906	83.954	86.5173	84.0873	2.36617
3MA+IMQ	78.4077	93.0098	86.0184	85.812	7.30326
Figure 1B
Media	1	2	3	AVE	STDEV
Control	98.1745	101.826	100	100	1.82552
Pan	99.1745	102.226	99.1778	100	1.76056
Nec-1	94.3084	102.442	98.0751	98.2751	4.07036
IMQ	1	2	3	AVE	STDEV
Control	54.2965	57.5264	62.8493	58.2241	4.31888
Pan	68.889	73.2903	65.0451	69.0748	4.12575
Nec-1	79.1727	69.2673	74.22	74.22	4.95271
Figure 1G
	1	2	3	AVE	STDEV
0	0	0	0	0	0
24	4.03024	4.325	4.96026	4.4385	0.475286
48	12.9219	15.6383	9.88621	12.8155	2.87752
72	26.9036	22.9565	21.2094	23.6898	2.91708

## Sheet: Figure 2
Figure 2A
	1	2	3	AVE	STDEV
0	100	100.001	99.9991	100	0.000950438
0.25	158.015	163.136	150.917	157.356	6.13658
0.5	174.265	160.155	166.998	167.139	7.05626
1	186.085	189.325	193.141	189.517	3.53151
6	206.452	208.961	213.507	209.64	3.57628
12	211.166	192.5	200.991	201.552	9.3458
24	284.15	302.816	293.346	293.437	9.33348
48	413.1	406.045	409.272	409.472	3.53185
Figure 2E
Media	1	2	3	AVE	STDEV
Control	100	98.2312	101.769	100	1.76884
U0126	91.1919	88.6411	95.1427	91.6586	3.27587
SB216763	75.9846	73.0875	79.9816	76.3512	3.46168
Wortmannin	90.8383	89.3725	87.5932	89.268	1.62507
IMQ	1	2	3	AVE	STDEV
Control	105.992	107.166	110.002	107.72	2.06132
U0126	83.675	83.6716	83.6813	83.676	0.00491285
SB216763	105.968	93.307	99.6512	99.6421	6.3306
Wortmannin	110.186	112.791	107.979	110.319	2.40837
Figure 2G
Media+IMQ	1	2	3	AVE	STDEV
0	100	99.999	100	100	0.000665833
0.25	91.9996	89.4844	95.8394	92.4411	3.20042
24	150.875	147	144.52	147.465	3.20295
siGSK3beta+IMQ	1	2	3	AVE	STDEV
0	99.9999	100	100	100	0.0001
0.25	109.173	104.092	98.1655	103.81	5.50899
24	128.009	134.364	130.99	131.121	3.17952

## Sheet: Figure 3
Figure 3C
Media	1	2	3	AVE	STDEV
Control	0.1044	2.4841	0	0.862833	1.40503
DMSO	1.95103	4.82726	3.2994	3.35923	1.43905
U0126	0	0	0	0	0
PD98059	0.0035	0	2.9714	0.991633	1.71453
SB216363	0	0	0	0	0
Wortmannin	0	0	0	0	0
IMQ	1	2	3	AVE	STDEV
Control	69.9474	60.6644	79.4303	70.014	9.38315
DMSO	61.3365	68.4809	54.5922	61.4699	6.94529
U0126	23.0484	18.1587	12.9834	18.0635	5.03319
PD98059	26.1256	18.9692	33.6559	26.2502	7.34415
SB216363	21.5628	28.5568	36.3486	28.8227	7.3965
Wortmannin	53.8075	47.5037	50.5656	50.6256	3.15235

## Sheet: Figure 4
Figure 4A
	1	2	3	AVE	STDEV
Con	0.006392	0.0112545	0.00172955	0.00645867	0.0047628
IMQ 30min	33.1218	28.837	24.3542	28.771	4.38419
IMQ 1hr	40.1199	49.0515	31.3085	40.16	8.87158
H2O2	81.7251	85.701	89.9689	85.7983	4.12278
Figure 4B
	1	2	3	AVE	STDEV
Con	0.18	0.420416	0.025	0.208472	0.19924
DPI	0.925	14.2311	1.425	5.52703	7.54208
IMQ	43.7522	72.9878	58.773	58.5043	14.6196
DPI+IMQ	35.5833	23.0633	29.6513	29.4327	6.26287
H₂O₂	62.2921	64.5867	71.0812	65.9867	4.55874
Figure 4C
	1	2	3	AVE	STDEV
Control	8.11426	5.19778	11.0651	8.1257	2.93366
DPI	5.37391	7.57323	6.3567	6.43461	1.10173
IMQ	67.1088	64.5276	68.8942	66.8435	2.19535
DPI+IMQ	26.8601	24.7521	22.5503	24.7208	2.15507

## Sheet: Figure 5
Figure 5A
	1	2	3	AVE	STDEV
Con	0.0002	0.0001	0	0.0001	0.0001
IMQ	66.5882	56.0945	76.7771	66.4866	10.3417
DPI	1.97462	0.002	6.07122	2.68262	3.09593
DPI+IMQ	11.1524	41.9399	21.466	24.8528	15.6707
Figure 5B
	1	2	3	AVE	STDEV
Con	99.9	110.394	89.7058	100	10.3445
IMQ	176.509	157.56	139.111	157.727	18.7
Apocynin	94.7941	82.032	69.7698	82.1986	12.513
Apo+IMQ	96.5153	109.201	121.725	109.147	12.6049
Figure 5C
LC3+ puncta	1	2	3	AVE	STDEV
Con	0.78259	1.78432	2.99604	1.85431	1.10838
IMQ	89.3906	62.2603	116.862	89.5042	27.3008
Colocalization	1	2	3	AVE	STDEV
Con	0.0011	0	0	0.000366667	0.000635085
IMQ	58.4864	42.3419	50.1414	50.3232	8.07377

## Sheet: Figure 6
Figure 6B
	1	2	3	AVE	STDEV
Con	27.0131	32.7222	21.9225	27.2193	5.40283
IMQ	57.5426	57.0741	58.7762	57.7976	0.879206
Figure 6C Left
Beclin-1+Tom20+	1	2	3	AVE	STDEV
Con	6.51781	5.3459	4.7933	5.55234	0.88059
IMQ	87.9129	64.8912	42.2871	65.0304	22.8132
Figure 6C Right
Beclin-1+BNIP3+	1	2	3	AVE	STDEV
Con	7.57778	4.12878	11.6268	7.77778	3.753
IMQ	59.2313	50.4652	68.6237	59.44	9.08108

## Sheet: Figure 7
Figure 7A
Raw264.7	1	2	3	AVE	STDEV
Con	60.3001	70.3666	64.9333	65.2	5.03852
IMQ 2 ug/ml	9.94256	22.5574	15.985	16.1617	6.30929
IMQ 10 ug/ml	3.88073	11.3526	7.9867	7.74001	3.74204
THP-1	1	2	3	AVE	STDEV
Con	6.88803	5.728	4.57863	5.73156	1.15471
IMQ 2 ug/ml	4.8245	4.0815	3.4755	4.12717	0.675658
IMQ 10 ug/ml	2.28499	2.0112	1.81672	2.03764	0.235255
Figure 7B
	24hr
	1	2	3	AVE	STDEV
Con	100.941	100.12	98.9394	100	1.00602
IMQ	142.748	137.279	125.81	135.279	8.64394
Mtb	168.36	164.731	159.927	164.34	4.22998
Mtb+IMQ	226.748	223.873	208.874	219.831	9.59792
	36hr
	1	2	3	AVE	STDEV
Con	170.554	170.561	170.558	170.558	0.00311341
IMQ	207.824	205.738	203.85	205.804	1.98744
Mtb	236.924	236.71	230.48	234.704	3.66031
Mtb+IMQ	292.539	285.01	271.08	282.876	10.8871
	48hr
	1	2	3	AVE	STDEV
Con	176.624	167.656	152.35	165.543	12.2743
IMQ	211.969	192.954	170.611	191.845	20.7015
Mtb	232.096	219.624	200.814	217.511	15.7475
Mtb+IMQ	486.214	453.748	414.945	451.636	35.6816
Figure 7C
	24hr
	1	2	3	AVE	STDEV
Con	1.62351	0.28704	0.1257	0.67875	0.822153
IMQ	41.3719	34.0329	26.4347	33.9465	7.46901
Mtb	39.3447	35.1231	30.912	35.1266	4.21635
Mtb+IMQ	91.214	80.1365	69.2154	80.1886	10.9994
	48hr
	1	2	3	AVE	STDEV
Con	0	0	0	0	0
IMQ	27.4488	27.6874	21.5881	25.5747	3.45457
Mtb	14.496	14.4992	8.16464	12.3866	3.65636
Mtb+IMQ	57.1495	49.6455	35.8037	47.5329	10.8286
Figure 7G
	1	2	3	4	5	AVE	STDEV
Mtb	53.1984	53.7234	50.7541	42.8974	49.2024	49.9551	4.3513
3-MA+Mtb	58.4322	58.9572	54.7207	42.9966	54.4364	53.9086	6.44128
Mtb+IMQ	17.6795	18.2045	18.6207	17.2333	15.6835	17.4843	1.13513
3-MA+Mtb+IMQ	52.7657	53.2907	48.3667	39.4264	50.7697	48.9238	5.6513
Figure 7H
		1	2	3	AVE	STDEV
-	-	10.5597	9.9425	8.50701	9.66972	1.05316
	IMQ	5.34162	4.4932	3.72504	4.51996	0.808622
siScr	-	10.4102	10.2632	9.898	10.1905	0.263732
	IMQ	6.6583	5.6019	4.5471	5.60243	1.0556
siBNIP3	-	15.5352	13.9116	12.4415	13.9628	1.54748
	IMQ	9.85462	9.3591	9.04786	9.42053	0.406874

## Sheet: Sup. Fig. S1
Sup. Fig. S1B	Raw264.7
IMQ	1	2	3	AVE	STDEV
0	100.025	105.391	94.584	100	5.40356
1	43.4353	50.7657	58.2113	50.8041	7.38806
2	31.1402	33.375	29.3042	31.2731	2.03865
4	28.1398	21.5925	24.6553	24.7959	3.27589
6	16.9986	19.0768	16.2188	17.4314	1.47732
8	7.95636	9.3747	10.8778	9.40295	1.46092
GDQ	1	2	3	AVE	STDEV
0	97.8643	100.012	102.124	100	2.12968
1	92.2622	100.625	108.463	100.45	8.10167
2	88.7392	101.248	95.031	95.006	6.25436
4	91.1485	93.1698	95.8022	93.3735	2.33351
6	89.2261	92.8817	91.0259	91.0446	2.58488
8	66.6156	67.1966	67.6727	67.1616	0.529447
Sup. Fig. S1C	THP-1
IMQ	1	2	3	AVE	STDEV
0	93.7663	100.025	106.209	100	6.22124
0.6	69.4243	70.4298	71.3397	70.3979	0.95812
1.2	67.1913	68.5039	69.7417	68.479	1.27537
2.4	61.1952	63.3028	65.2528	63.2503	2.02931
4.8	54.2612	55.3214	56.2902	55.2909	1.01485
9.6	46.6648	49.2236	51.2324	49.0403	2.28931
GDQ	1	2	3	AVE	STDEV
0	99.874	95.605	104.521	100	4.45935
0.6	99.3141	96.5161	102.011	99.2804	2.74761
1.2	80.4839	76.2696	84.4359	80.3965	4.08382
2.4	72.5966	72.3417	72.7736	72.5706	0.217136
4.8	68.2215	75.4448	71.8718	71.846	5.10768
9.6	80.9114	80.4607	81.0922	80.8214	0.325241
Sup. Fig. S1E
	1	2	3	AVE	STDEV
Untreated	1.025	0.9148	1.0602	1	0.0758554
IMQ	4.345	4.62	3.995	4.32	0.313249
Baf A1	1.015	0.9655	0.9895	0.99	0.0247538
Baf A1+IMQ	2.971	2.865	2.684	2.84	0.145124
Sup. Fig. S1F
		1	2	3	AVE	STDEV
siScr	-	1.0251	0.97361	1.00129	1	0.025769
	IMQ	3.03548	2.60231	3.45664	3.03148	0.42718
siAtg7	-	0.98879	0.976003	0.987833	0.984209	0.00712241
	IMQ	1.28819	1.22313	1.27795	1.26309	0.0349858
siBNIP3	-	0.986546	0.96859	1.00111	0.985415	0.0162894
	IMQ	1.34976	1.29246	1.35198	1.3314	0.0337413
siScr	Mtb	1.50595	1.41845	1.51814	1.48085	0.054378
	Mtb+IMQ	4.7758	4.56773	4.97574	4.77309	0.204018
siAtg7	Mtb	1.7693	1.76579	1.75469	1.76326	0.00762651
	Mtb+IMQ	3.019	3.00819	3.04117	3.02279	0.0168136
siBNIP3	Mtb	1.78301	1.75947	1.79138	1.77795	0.0165457
	Mtb+IMQ	3.19784	3.1078	3.35436	3.22	0.124765
Sup. Fig. S1G
Media	1	2	3	AVE	STDEV
Control	0.681694	0.627924	0.660164	0.656594	0.027062
U0126	1.22971	1.29683	1.30143	1.27599	0.0401467
SB216763	0.54009	0.578194	0.557633	0.558639	0.0190719
Wortmannin	0.95012	0.970604	0.957739	0.959488	0.0103531
IMQ	1	2	3	AVE	STDEV
Control	4.22151	4.12706	4.01573	4.12143	0.103004
U0126	2.78952	2.80149	2.72828	2.7731	0.0392728
SB216763	1.68259	1.607	1.53825	1.60928	0.0721957
Wortmannin	4.73412	4.71798	4.62512	4.69241	0.0588305
Sup. Fig. S1H	Raw264.7
	1	2	3	AVE	STDEV
NT	1.06208	1.0251	0.912818	1	0.0777334
Z-VAD	1.0123	0.96784	0.848084	0.94274	0.0849354
Nec-1	0.981797	0.973975	0.890854	0.948875	0.0504001
3-MA	0.971753	0.949435	0.851818	0.924335	0.063786
Wort	0.959327	0.91876	0.802894	0.89366	0.0811806
DPI	0.971077	0.935121	0.823864	0.910021	0.0767495
Baf A1	1.03057	0.97193	0.837993	0.94683	0.0987101
U0126	0.956495	0.965795	0.899796	0.940695	0.0357242
SB216763	0.955302	0.978065	0.925529	0.952965	0.026346
Sup. Fig. S1H	THP-1
	1	2	3	AVE	STDEV
NT	1.07163	0.928111	1.13985	1.04653	0.10808
z-VAD	0.867609	0.787724	0.872194	0.842509	0.047501
Nec-1	0.84316	0.662768	0.948251	0.81806	0.144387
3-MA	0.820836	0.618417	0.947956	0.795736	0.166197
Wort	0.919098	0.712525	1.05037	0.893998	0.170316
Baf A1	0.926111	0.814281	0.962642	0.901011	0.0772998
U0126	0.875256	0.590926	1.08429	0.850156	0.247636
SB216763	0.930511	0.832822	0.9529	0.905411	0.0638525

## Sheet: Sup. Fig. S2
Sup. Fig. S2A, Left	Raw264.7
	1	2	3	AVE	STDEV
-	7.02409	8.19261	9.02212	8.07961	1.00379
2	2.3583	3.83522	4.97315	3.72222	1.31108
10	1.06929	2.68244	3.9566	2.56944	1.44697
Sup. Fig. S2A, Righ	THP-1
	1	2	3	AVE	STDEV
-	7.37252	7.91786	6.48819	7.25952	0.721504
2	6.42087	6.53906	5.96368	6.30787	0.303881
10	2.68244	3.9566	1.06929	2.56944	1.44697
Sup. Fig. S2B
	1	2	3	AVE	STDEV
-	40.2466	36.5618	43.5924	40.1336	3.51669
SNP	19.2286	16.4336	21.6846	19.1156	2.62732
IMQ	24.87	23.388	26.013	24.757	1.31614
IMQ+SNP	8.67246	3.21998	13.7859	8.55946	5.28389
Sup. Fig. S2C
		1	2	3	AVE	STDEV
siSCr	Con	56.488	55.4463	54.065	55.3331	1.21548
	IMQ	26.2884	23.4533	20.1653	23.3023	3.06434
siAtg7	Con	77.4967	73.9463	69.057	73.5	4.2375
	IMQ	67.4162	59.5633	51.1374	59.3723	8.14108
siBNIP3	Con	99.3137	88.113	76.5733	88	11.3706
	IMQ	87.5467	83.4463	79.157	83.3833	4.19519
Sup. Fig. S2D
		1	2	3	AVE	STDEV
WT	Con	51.5075	46.4219	41.1163	46.3486	5.19595
	IMQ	25.2845	22.4546	20.1465	22.6285	2.57341
MyD88-/-	Con	71.7728	70.3113	72.8953	71.6598	1.29566
	IMQ	58.5595	52.2557	64.6834	58.4995	6.21404
Sup. Fig. S2E
		1	2	3	4	AVE	STDEV
WT	Con	0	0	2.38095	0	0.595238	1.19048
	IMQ	51.2195	84.6154	87.0968	87.5	77.6079	17.6384
MyD88-/-	Con	0	2.22222	3.0303	0	1.31313	1.55175
	IMQ	5	2.5641	6.66667	2.85714	4.27198	1.93073
Sup. Fig. S2F	TNF
	1	2	3	AVE	STDEV
-	N.D	N.D	N.D	0	0
IMQ	7.13461	7.42439	7.449	7.336	0.174841
Mtb	16.1251	17.341	18.2179	17.228	1.05102
Mtb+IMQ	14.7174	22.0076	18.532	18.419	3.64638
Sup. Fig. S2F	IL-10
	1	2	3	AVE	STDEV
-	190.996	141.78	92.2252	141.667	49.3854
IMQ	1168.59	954.627	1061.78	1061.67	106.983
Mtb	741.78	682.959	800.262	741.667	58.6512
Mtb+IMQ	991.217	905.113	818.67	905	86.2733
